# Supplementary material
Source: publisher site journal article supplement (https://www.dovepress.com/article/571178)
Supplement: Supplementary file 1 [file 571178%20Supplementary%20Table.docx]

**Supplementary Table** Post-hoc power for Spearman’s correlation analyses

|  | Auditory | Visual | Vestibular | Touch | Multisensory | Oral Sensory |
| --- | --- | --- | --- | --- | --- | --- |
| Bedtime | .130 | .008 | .018 | .200 | .209 | .030 |
| Time one falls sleep | .137 | .009 | .029 | .241 | .268 | .028 |
| Last awakening time | .253 | .046 | .067 | .024 | .116 | .014 |
| Time to get out of bed | .286 | .040 | .070 | .027 | .138 | .016 |
| Sleep Period Time (SPT) | .010 | .029 | .014 | .078 | .009 | .053 |
| Total Sleep Time (TST) | .008 | .009 | .011 | .148 | .012 | .152 |
| Time In Bed (TIB) | .009 | .025 | .010 | .051 | .011 | .064 |
| Sleep Latency (SL) | .018 | .009 | .008 | .031 | .049 | .047 |
| Bed Out Latency (BOL) | .013 | .176 | .013 | .008 | .020 | .008 |
| Sleep Efficiency (SEI) | .010 | .008 | .019 | .101 | .008 | .185 |
| Wake After Sleep Onset (WASO) | .011 | .008 | .018 | .056 | .008 | .259 |
| Number of awakenings in the middle of the day | .012 | .019 | .011 | .019 | .012 | .046 |
| Average awakening duration | .009 | .018 | .008 | .233 | .008 | .**802*** |
| Number of postural transformations (every 2 min) | .016 | .017 | .008 | .008 | .008 | .045 |
| Number of awakenings over 8 min | .011 | .009 | .024 | .070 | .008 | .213 |

**Notes:** Values are Spearman’s rank correlation coefficients (rs) with 95% confidence intervals in brackets [lower, upper]. Bonferroni correction was applied across the six sensory processing scores for each sleep variable (p = 0.05/6 = 0.0083). P < 0.0083 was considered significant. Significant correlation was observed between oral sensation and mean arousal time, with P < 0.008 (values indicated by * and emphasized in bold).
